# Supplementary material for: Multimorbidity healthcare expenditure in Belgium: a 4-year analysis (COMORB study)
Source: PubMed Central journal article supplement (PMC10960468; doi:10.1186/s12961-024-01113-x), 2024-03-22
Supplement: 12961_2024_1113_MOESM2_ESM.pdf [file 12961_2024_1113_MOESM2_ESM.pdf]

## Procedure group codes

- 1 Medical fees - Clinical biology
- 2 Medical fees - Fees / packages
- 3 Medical fees - Consultations, visits and advice
- 4 Medical fees - Special services
- 5 Medical fees - Surgery
- 6 Medical fees - Gynecology
- 7 Medical fees - Surveillance
- 8 Dental fees
- 9 Fees for nursing practitioners
- 10 Pharmaceutical specialties - Specialties delivered to non-hospitalized beneficiaries
- 11 Pharmaceutical specialties - Specialties from the hospital pharmacy, delivered to patients
- 12 Pharmaceutical specialties - Specialties delivered to beneficiaries hospitalized
- 13 Pharmaceutical services - Official receipts - Conditional nature
- 14 Pharmaceutical services - On-call fees
- 15 Pharmaceutical services - Blood and blood plasma
- 16 Pharmaceutical services - Medical resources
- 17 Pharmaceutical services - Medical food
- 18 Pharmaceutical services - Miscellaneous pharmaceutical services
- 19 Care by physiotherapists
- 20 Care by bandagists
- 21 Care by orthopedists
- 22 Implants and implantable heart defibrillators
- 23 Care by opticians
- 24 Care by audicians
- 25 Births by midwives
- 26 Price per maintenance day
- 27 Military hospital - all-price in
- 28 Flat rate for maintenance day in the general hospital
- 29 Dialysis - Doctors
- 30 Dialysis - Flat rate renal dialysis
- 31 Dialysis - At home, in a center
- 32 MRS/MRPA/Day care centers - Rest and care homes
- 33 MRS/MRPA/Day care centers - Nursing homes for the elderly
- 34 MRS/MRPA/Day care centers - Day care centers - Coma
- 35 Mental health care - Psychiatric care homes
- 36 Mental health care - Sheltered housing initiatives
- 37 Mental health care - Lump sum for maintenance day in the psychiatric hospital
- 38 Functional and vocational rehabilitation
- 39 Special Fund
- 40 Speech therapy
- 41 Paediatric medical centres
- 42 Other accommodation and travel expenses

- 44 Social maximum invoice
- 45 Chronic patients
- 46 Palliative care (patient)
- 47 Human tissues
- 48 Adjustments + re-invoicing
- 49 Palliative care
- 50 Spa treatments
- 51 Support for multidisciplinary care, first line
- 52 Benefits drugs - Oxygen
- 53 Multidisciplinary teams
- 54 Smoking cessation
- 55 Medical centers
- 56 SP/ALS/Huntington
- 57 Nursing day prize (sixth state reform)
- 58 RVT/ROB/Day care centers (excluding sixth state reform)
- 59 Rehabilitation and retraining (sixth state reform)
- 60 Multidisciplinary primary care (sixth state reform)
- 61 Care by bandagists (sixth state reform)
- 62 Regularizations (regional competence)
- 63 Psychological care
- 64 Healthcare innovation
- 80 Magnetic strips
- 81 Statistical codes
- 82 Nomenclature of the framework
- 83 Article 56 - Dental care for underprivileged children and specific contraceptive intervention for young people
- 84 Emergency and enteral nutrition co-payments (app. Maximum invoice)
- 85 Neuropsychiatry ceiling code
- 86 Wrongly paid amounts
- 87 Maximum dental rates
- 88 Wrongly paid amounts charged to ZIV
- 90 International conventions
